# Supplementary material
Source: PubMed Central journal article supplement (PMC5397363)

**Structural Modeling and Functional Analysis of the Essential Ribosomal Processing Protease Prp from *Staphylococcus aureus***

Erin A Wall<sup>a,c</sup>, Adam L Johnson<sup>a,d</sup>, Darrell L Peterson<sup>b</sup>, Gail E Christie<sup>a1</sup>

Departments of <sup>a</sup>Microbiology and Immunology and <sup>b</sup>Biochemistry and Molecular Biology, Virginia Commonwealth University School of Medicine, Richmond VA 23298

<sup>c</sup>Current address: Laboratory of Molecular Biology, Center for Cancer Research, National Cancer Institute, Bethesda, MD 20892

<sup>d</sup>Current address: Department of Medicinal Chemistry, Virginia Commonwealth University School of Pharmacy, Richmond, VA 23298

<sup>1</sup>Communicating author

**Supplementary Information**

**Table S1. Strains and Plasmids**

| <b><i>E. coli</i> strains</b>   |                                                                                                                                                                                                                                                                                              |                                  |
|---------------------------------|----------------------------------------------------------------------------------------------------------------------------------------------------------------------------------------------------------------------------------------------------------------------------------------------|----------------------------------|
| <b>Name</b>                     | <b>Description</b>                                                                                                                                                                                                                                                                           | <b>Reference or source</b>       |
| Stellar™                        | <i>E. coli</i> F <sup>-</sup> , <i>endA1</i> , <i>supE44</i> , <i>thi-1</i> , <i>recA1</i> , <i>relA1</i> , <i>gyrA96</i> , <i>phoA</i> , $\Phi 80d$ <i>lacZ</i> $\Delta$ M15, $\Delta$ ( <i>lacZYA-argF</i> )U169, $\Delta$ ( <i>mrr-hsdRMS-mcrBC</i> ), $\Delta$ <i>mcrA</i> , $\lambda^-$ | Clontech                         |
| BL21-CodonPlus™ (DE3)-RIL       | <i>E. coli</i> B F <sup>-</sup> <i>ompT</i> <i>hsdS</i> (r <sub>8</sub> <sup>-</sup> m <sub>8</sub> <sup>-</sup> ) <i>dcm</i> <sup>+</sup> Tet <sup>r</sup> <i>gal</i> $\lambda$ (DE3) <i>endA</i> Hte [ <i>argU</i> <i>ileY</i> <i>leuW</i> Cam <sup>r</sup> ]                              | Agilent Technologies             |
| ScarabXpress® T7 <i>lac</i>     | Reduced genome T7 expression strain                                                                                                                                                                                                                                                          | Scarab Genomics                  |
| <b><i>S. aureus</i> strains</b> |                                                                                                                                                                                                                                                                                              |                                  |
| RN4220                          | Restriction-defective derivative of RN450                                                                                                                                                                                                                                                    | Kreiswirth <i>et al.</i> , 1983  |
| SA178RI                         | RN4220 derivative expressing T7 RNA polymerase from P <sub>spac</sub> - <i>lacO</i>                                                                                                                                                                                                          | D'Elia <i>et al.</i> , 2006      |
| ST256                           | SA178RI [pEW27] ; expresses L27 from T7/ <i>lac</i> promoter                                                                                                                                                                                                                                 | This work                        |
| ST360                           | SA178RI L27::SpecR [pEW27]<br>This strain is IPTG-dependent                                                                                                                                                                                                                                  | This work                        |
| <b>Plasmids</b>                 |                                                                                                                                                                                                                                                                                              |                                  |
| pCN55                           | <i>E. coli</i> / <i>S. aureus</i> shuttle vector containing <i>aad-9</i> Spec <sup>R</sup> cassette                                                                                                                                                                                          | Charpentier <i>et al.</i> , 2004 |
| pET21d(+)                       | <i>E. coli</i> T7 expression vector                                                                                                                                                                                                                                                          | Novagen                          |
| pET SUMO                        | TA cloning vector with SUMO tag                                                                                                                                                                                                                                                              | Invitrogen                       |
| pG164                           | <i>S. aureus</i> T7 expression vector                                                                                                                                                                                                                                                        | D'Elia <i>et al.</i> , 2006      |
| pHYRS52                         | His <sub>6</sub> -tagged ULP1 protease expressed from T7/ <i>lac</i> promoter                                                                                                                                                                                                                | Addgene                          |
| pMAD                            | <i>E. coli</i> - <i>S. aureus</i> shuttle vector for allelic exchange                                                                                                                                                                                                                        | Arnaud <i>et al.</i> , 2004      |
| pT104                           | P <sub>ars</sub> expression vector for <i>S. aureus</i>                                                                                                                                                                                                                                      | Liu <i>et al.</i> , 2004         |
| pRW                             | pET21d derivative for expression of proteins with an N-terminal His <sub>6</sub> -SUMO tag                                                                                                                                                                                                   | This work                        |
| pEW27                           | <i>S. aureus</i> L27 under T7 promoter, IPTG-inducible                                                                                                                                                                                                                                       | Wall <i>et al.</i> , 2015        |
| pEW34                           | pRW derivative; His <sub>6</sub> -SUMO-Prp wild-type                                                                                                                                                                                                                                         | This work                        |
| pEW40                           | pRW derivative; His <sub>6</sub> -SUMO-Prp C34S (TGT → AGT)                                                                                                                                                                                                                                  | This work                        |

|       |                                                                                                            |           |
|-------|------------------------------------------------------------------------------------------------------------|-----------|
| pEW68 | pMAD derivative; allelic exchange vector for replacement of L27 with Spec <sup>R</sup> cassette from pCN55 | This work |
| pEW72 | pT104 derivative; WT L27 expression in <i>S. aureus</i>                                                    | This work |
| pEW73 | pT104 derivative; L27 $\Delta$ 2-9 expression in <i>S. aureus</i>                                          | This work |
| pEW74 | pT104 derivative; L27 FF::AA expression in <i>S. aureus</i>                                                | This work |
| pEW75 | pT104 derivative; L27 $\Delta$ 2-9 and L27 1-9 peptide expression in <i>S. aureus</i>                      | This work |
| pEW76 | pG164 derivative; L27 $\Delta$ 2-9 His <sub>6</sub> expression in <i>S. aureus</i> (for Edman degradation) | This work |
| pALJ5 | pRW derivative; His <sub>6</sub> -SUMO-Prp S38A (TCA → GCT)                                                | This work |
| pALJ6 | pRW derivative; His <sub>6</sub> -SUMO-Prp D31A (GAT → GCA)                                                | This work |
| pALJ7 | pRW derivative; His <sub>6</sub> -SUMO-Prp H22A (CAT → GCA)                                                | This work |
| pALJ8 | pRW derivative; His <sub>6</sub> -SUMO-Prp G21A (GGC → GCA)                                                | This work |

## References

- Arnaud, M., Chastanet, A., and Debarbouille, M. (2004) New vector for efficient allelic replacement in naturally nontransformable, low-GC-content, gram-positive bacteria. *Appl Environ Microbiol* **70**: 6887-6891.
- Charpentier, E., Anton, A.I., Barry, P., Alfonso, B., Fang, YI, and Novick, R.P. (2004) Novel cassette-based shuttle vector system for gram-positive bacteria. *Appl Environ Microbiol* **70**: 6076-6085.
- D'Elia, M.A., Pereira, M.P., Chung, Y.S., Zhao, W., Chau, A., Kenney, T.J., et al. (2006) Lesions in teichoic acid biosynthesis in *Staphylococcus aureus* lead to a lethal gain of function in the otherwise dispensable pathway. *J Bacteriol* **188**: 4183-4189.
- Kreiswirth, B.N., Lofdahl, S., Betley, M.J., O'Reilly, M., Schlievert, P.M., Bergdoll, M.S., and Novick, R.P. (1983) The toxic shock syndrome exotoxin structural gene is not detectably transmitted by a prophage. *Nature* **305**: 709-712.
- Liu, J., Dehbi, M., Moeck, G, Arhin, F, Bauda, P., Bergeron, D., et al. (2004) Antimicrobial drug discovery through bacteriophage genomics. *Nat. Biotechnol* **22**: 185-191.
- Wall, E.A., Caufield, J.H., Lyons, C.E., Manning, K.A., Dokland, T., and Christie, G.E. (2015) Specific N-terminal cleavage of ribosomal protein L27 in *Staphylococcus aureus* and related bacteria. *Mol Microbiol* **95**: 258-269.

## Table S2. Primers

Primers are organized based on the plasmids constructed, and templates are indicated. The annealing sequence for amplification is underlined and the 5' 15-16 bp homologous overhang required for the In-Fusion reaction is separated from the rest of the primer by an asterisk (\*). Restriction sites used to linearize the plasmid prior to assembly are shown in bold in the sequence when they were reconstituted in the finished assembly or, in the case of pRW, for cleavage and ligation. Parentheses indicate a codon change for site-directed mutagenesis. Double asterisks (\*\*) indicate that these primers were not used for PCR but were annealed to form a ds DNA fragment that was assembled during the In-Fusion reaction.

| <b>pEW34</b>                                                                                                                                                                              |                                                                                                   |
|-------------------------------------------------------------------------------------------------------------------------------------------------------------------------------------------|---------------------------------------------------------------------------------------------------|
| <i>Template: RN4220</i>                                                                                                                                                                   |                                                                                                   |
| EAW101                                                                                                                                                                                    | AGA ACA GAT TGG AGG* C <u>ATG ATT ACT GTT GAT ATT ACA GTT AAT GAT GAA GG</u>                      |
| EAW102                                                                                                                                                                                    | GTG CGG CCG CAA GCT* <u>TCA CTT ATA ATT TAA TCT AAT ATT CTC ATT ATA TTC TTC</u><br><u>TTC AAT</u> |
| <b>pEW40</b>                                                                                                                                                                              |                                                                                                   |
| <i>Template: pEW35 (Wall et al. 2015)</i>                                                                                                                                                 |                                                                                                   |
| EAW101                                                                                                                                                                                    | AGA ACA GAT TGG AGG* C <u>ATG ATT ACT GTT GAT ATT ACA GTT AAT GAT GAA GG</u>                      |
| EAW102                                                                                                                                                                                    | GTG CGG CCG CAA GCT* <u>TCA CTT ATA ATT TAA TCT AAT ATT CTC ATT ATA TTC TTC</u><br><u>TTC AAT</u> |
| <b>pEW68</b>                                                                                                                                                                              |                                                                                                   |
| <i>Templates: EAW 45+196 amplify L27 5' flank from RN4220, EAW197+198 amplify the aad9 SpecR cassette from pCN55 (Charpentier et al 2004), EAW199+48 amplify L27 3' flank from RN4220</i> |                                                                                                   |
| EAW45                                                                                                                                                                                     | CGA TGC ATG <b>CCA TGG</b> *TAT ACA GGA GGT GCA AAG TAT GTT TGC TAT TAT TG                        |
| EAW196                                                                                                                                                                                    | <u>CGG AAT GCA CCT CAC TTA TAA TTT AAT CTA ATA TTC TCA TTA TAT TC</u>                             |
| EAW197                                                                                                                                                                                    | GTG AGG TGC ATT CCG * <u>ATC GAA TCC CTT CGG AGC G</u>                                            |
| EAW198                                                                                                                                                                                    | <u>CCG CGG TAA TAA ACT ATC GAA GGA AC</u>                                                         |
| EAW199                                                                                                                                                                                    | AGT TTA TTA CCG CGG * <u>GCA GTA GCT GAA TAA TTT TGT CTA GTT AAC ACC</u>                          |
| EAW48                                                                                                                                                                                     | GGC GAT ATC <b>GGA TCC</b> * <u>TTT ACC ACC GTC ACC GCC</u>                                       |
| <b>pEW72</b>                                                                                                                                                                              |                                                                                                   |
| <i>Template: pEW27 (Wall et al, 2015)</i>                                                                                                                                                 |                                                                                                   |
| EAW217                                                                                                                                                                                    | GTT GAT GAG <b>GGG ATC</b> *C ATG TTA AAA TTA AAC TTA CAA TTC TTC GCA TCT A                       |
| EAW218                                                                                                                                                                                    | GCT AAG CTT <b>GGT CGA</b> * C <u>TTA TTC AGC TAC TGC ATA TAC AGA AAC TTG TTT TTT G</u>           |
| <b>pEW73</b>                                                                                                                                                                              |                                                                                                   |
| <i>Template: RN4220</i>                                                                                                                                                                   |                                                                                                   |

|                                           |                                                                                                                           |
|-------------------------------------------|---------------------------------------------------------------------------------------------------------------------------|
| EAW223                                    | GTT GAT GAG <u>GGG ATC* C</u> ATG GCA TCT AAA AAA GGG G                                                                   |
| EAW218                                    | GCT AAG CTT <u>GGT CGA* C</u> TTA TTC AGC TAC TGC ATA TAC AGA AAC TTG TTT TTT G                                           |
| <b>pEW74</b>                              |                                                                                                                           |
| <i>Template: pEW41 (Wall et al, 2015)</i> |                                                                                                                           |
| EAW224                                    | GTT GAT GAG <u>GGG ATC* C</u> ATG TTA AAA TTA AAC TTA CAA GCA GC                                                          |
| EAW218                                    | GCT AAG CTT <u>GGT CGA* C</u> TTA TTC AGC TAC TGC ATA TAC AGA AAC TTG TTT TTT G                                           |
| <b>pEW75</b>                              |                                                                                                                           |
| EAW227**                                  | TAA GTC GAC CAA <u>GCT* T</u> AGG AGG TGG ATC ATG TTA AAA TTA AAC TTA CAA TTC<br>TTC TAA <u>A* AGC</u> TTA GCT AGC TAG    |
| EAW228**                                  | CTA GCT AGC TAA <u>GCT* T</u> TTA GAA GAA TTG TAA GTT TAA TTT TAA CAT GAT CCA CCT<br>CCT <u>A* AGC</u> TTG GTC GAC TTA    |
| <b>pEW76</b>                              |                                                                                                                           |
| <i>Template: RN4220</i>                   |                                                                                                                           |
| EAW88                                     | GAA AGG AGG <u>TGG ATC C</u> *ATG <u>GCA TCT AAA AAA GGG GTA AGT TCT ACA AAA AAC</u><br><u>G</u>                          |
| EAW229                                    | GCA GGA GCT <u>CGA ATT * C</u> TTA ATG ATG ATG ATG ATG ATG <u>TTC AGC TAC TGC ATA</u><br><u>TAC AGA AAC TTG TTT TTT G</u> |
| <b>pALJ7</b>                              |                                                                                                                           |
| <i>Template: RN4220</i>                   |                                                                                                                           |
| EAW101                                    | AGA ACA GAT TGG AGG* C <u>ATG ATT ACT GTT GAT ATT ACA GTT AAT GAT GAA GG</u>                                              |
| EAW185                                    | GTC AGC (TGC) <u>GCC ATC* CAT AAT AAC GTC TGT TAC TTT G</u>                                                               |
| EAW186                                    | GAT GGC (GCA) <u>GCT GAC* CATG GTG AAT ATG GTC</u>                                                                        |
| EAW102                                    | GTG CGG CCG CAA GCT* <u>TCA CTT ATA ATT TAA TCT AAT ATT CTC ATT ATA TTC TTC</u><br><u>TTC AAT</u>                         |
| <b>pALJ5</b>                              |                                                                                                                           |
| <i>Template: RN4220</i>                   |                                                                                                                           |
| EAW101                                    | AGA ACA GAT TGG AGG* C <u>ATG ATT ACT GTT GAT ATT ACA GTT AAT GAT GAA GG</u>                                              |
| EAW189                                    | TAC AGC (AGC) <u>AGC TCC* AGC ACA AAC GAT ATC ATG ACC</u>                                                                 |
| EAW190                                    | GGA GCT (GCT) <u>GCT GTA* TTG TTT GGT AGT GTT AAT GCG ATT ATA GG</u>                                                      |
| EAW102                                    | GTG CGG CCG CAA GCT* <u>TCA CTT ATA ATT TAA TCT AAT ATT CTC ATT ATA TTC TTC</u><br><u>TTC AAT</u>                         |
| <b>pALJ6</b>                              |                                                                                                                           |
| <i>Template: RN4220</i>                   |                                                                                                                           |
| EAW101                                    | AGA ACA GAT TGG AGG* C <u>ATG ATT ACT GTT GAT ATT ACA GTT AAT GAT GAA GG</u>                                              |

|                                        |                                                                                                   |
|----------------------------------------|---------------------------------------------------------------------------------------------------|
| EAW191                                 | AAC GAT (TGC) <u>ATG ACC*</u> ATA TTC ACC ATG GTC AGC ATG                                         |
| EAW192                                 | GGT CAT (GCA) <u>ATC GTT*</u> TGT GCT GGA GCT TCA GC                                              |
| EAW102                                 | GTG CGG CCG CAA GCT* <u>TCA CTT ATA ATT TAA TCT AAT ATT CTC ATT ATA TTC TTC</u><br><u>TTC AAT</u> |
| <b>pALJ8</b>                           |                                                                                                   |
| <i>Template: RN4220</i>                |                                                                                                   |
| EAW101                                 | AGA ACA GAT TGG AGG* C <u>ATG ATT ACT GTT GAT ATT ACA GTT AAT GAT GAA GG</u>                      |
| EAW225                                 | AGC ATG (TG) <u>C</u> ATC CAT* AAT AAC GTC TGT TAC TTT GCC TTC                                    |
| EAW226                                 | ATG GAT G(CA) <u>CAT GCT*</u> GAC CAT GGT GAA TAT GGT C                                           |
| EAW102                                 | GTG CGG CCG CAA GCT* <u>TCA CTT ATA ATT TAA TCT AAT ATT CTC ATT ATA TTC TTC</u><br><u>TTC AAT</u> |
| <b>pRW</b>                             |                                                                                                   |
| <i>Template: pET SUMO (Invitrogen)</i> |                                                                                                   |
| SUF2                                   | GGC <u>CAT GGG</u> CAG CAG CCA TCA TCA TC                                                         |
| SUR                                    | CCG <b>GAT CCG</b> AGG <u>CCT CCA ATC TGT TCT CTG TGA GCC</u>                                     |

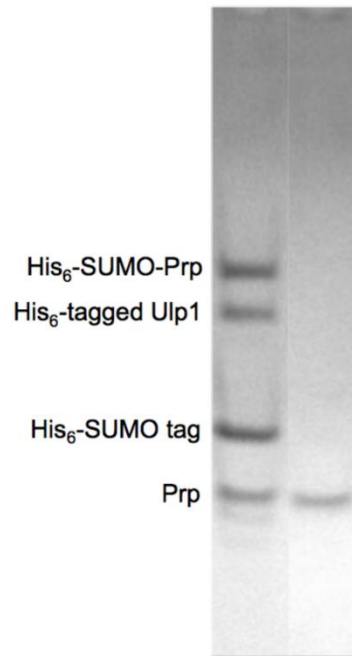

**Figure S1. SDS-PAGE of Prp pre- and post-purification.**

The left lane of this composite gel shows the products present in the His<sub>6</sub>-SUMO-Prp:His<sub>6</sub>-tagged Ulp1 cleavage reaction after initial elution from a Ni-NTA column, before re-purification by nickel affinity chromatography. The right lane shows purified, tagless Prp that was eluted during the second nickel affinity chromatography purification step.

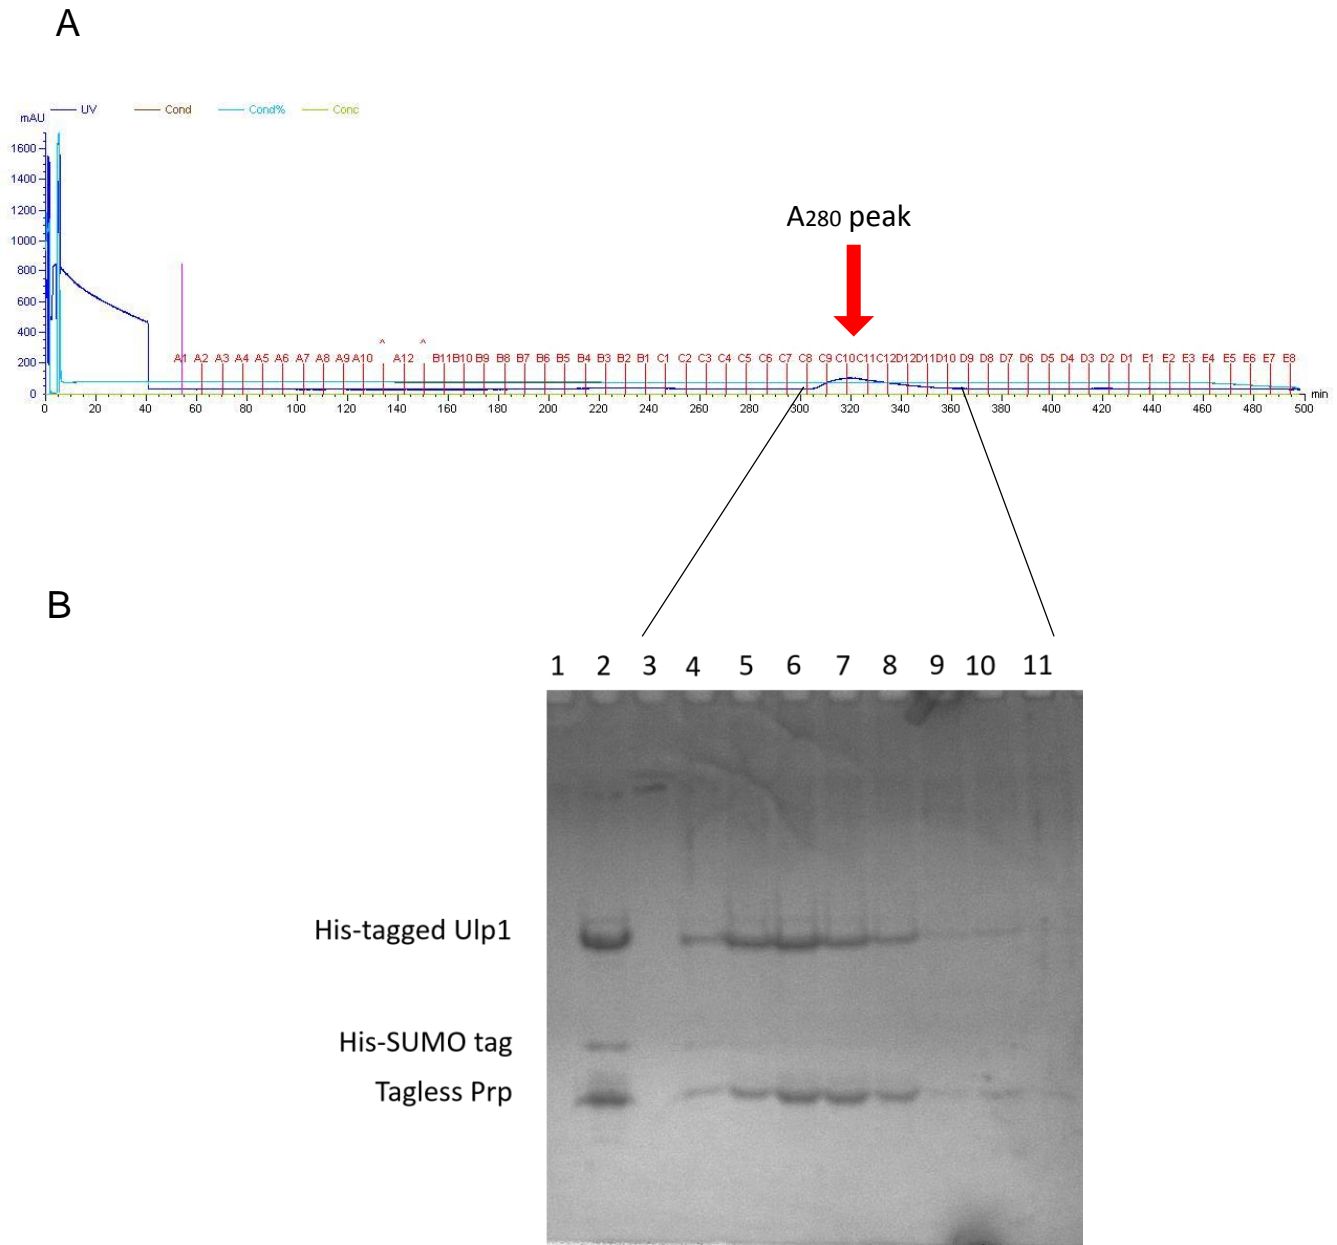

**Figure S2. Size exclusion chromatography demonstrates that Prp is a dimer in solution**

**A.** A concentrated sample of the cleavage reaction containing His-SUMO-Prp and His-tagged Ulp1 was purified via FPLC on a P10 size-exclusion column (MWCO 20,000). One peak eluted over fractions C8-D10. These fractions were analyzed by SDS-PAGE and showed that tag-less Prp (MW 11,691.79) had co-eluted with His-tagged Ulp1 (MW 27,394.05), indicating that Prp is a dimer with an approximate MW of 23,383.

**B.** SDS-PAGE gel showing tagless Prp (MW 11,691.79) co-eluted from a P10 size-exclusion column with His-tagged Ulp1 (MW 27,394.05), indicating Prp is a dimer (MW ~23,383). Lane 1-blank, 2-His-SUMO-Prp cleavage reaction, 3-blank, 4-C8, 5-C9, 6-C10, 7-C11, 8-C12, 9-D12, 10-D11, 11-D10



A

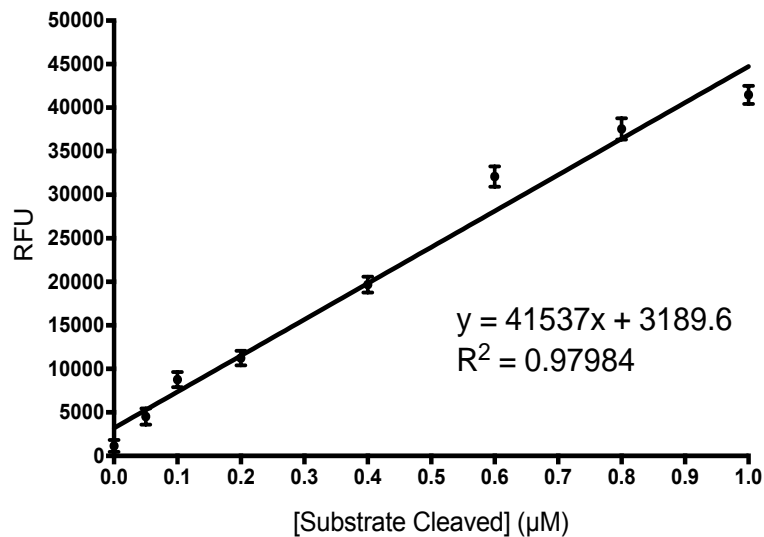

B

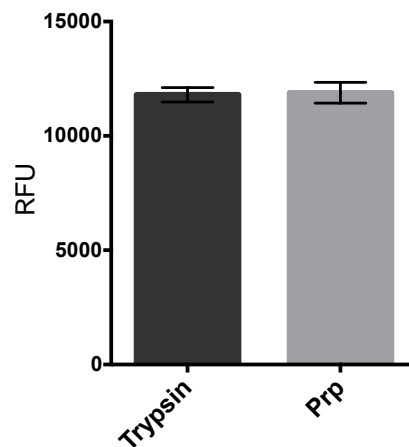

**Figure S3. Conversion of fluorescence to substrate concentration.**

**A.** Standard curve generated by cleaving varying amounts of fluorogenic peptide using trypsin. The fluorogenic peptide contains three lysine sites that trypsin can cleave. The equation of the standard curve was used to convert the raw RFU values from Prp assays to concentrations of substrate cleaved.

**B.** Cleavage of 2 µM fluorogenic substrate with 10µg of trypsin or Prp. The absolute RFU values from four completed reactions were averaged. These results indicate that both reactions proceeded to the same extent of completion. The RFU axis is different from that in A because the gain of the spectrophotometer was adjusted downward.

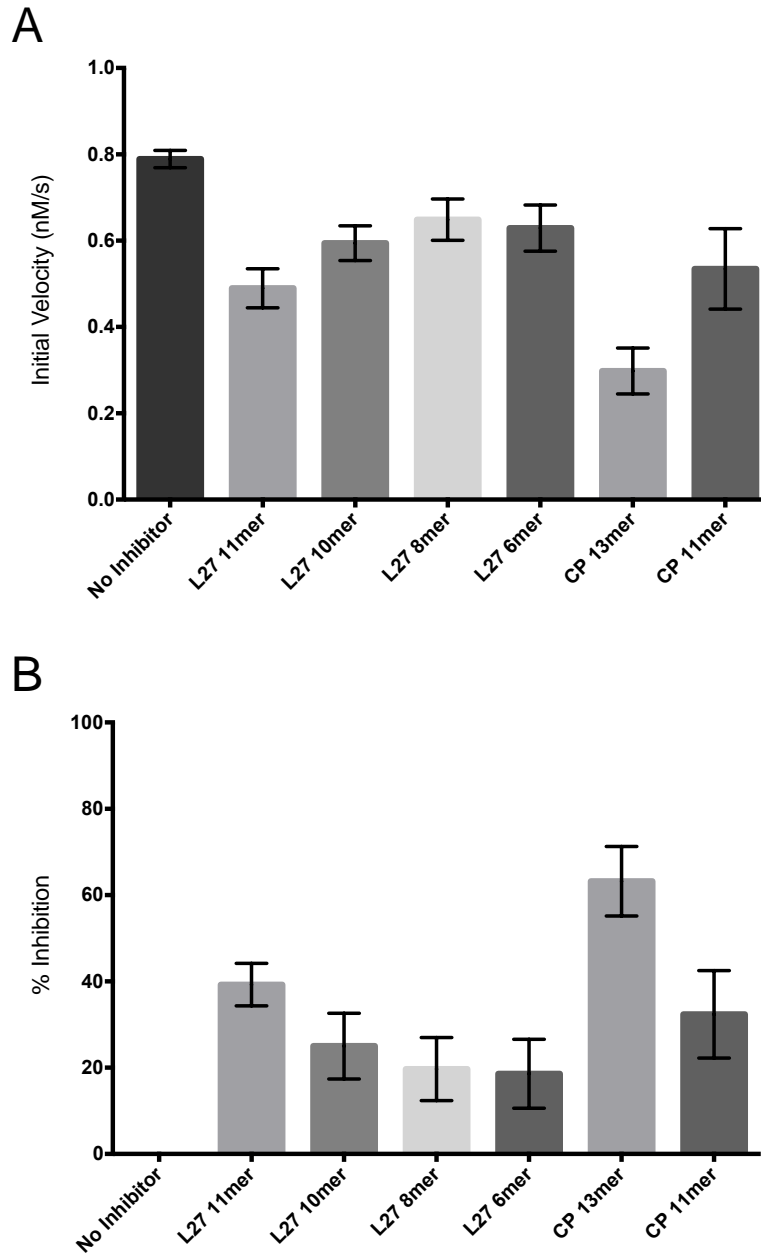

**Figure S4. Effects of competitive peptides on Prp activity**

**A.** The average initial velocity for reactions containing 29.3 nM Prp and 0.8  $\mu$ M of each peptide inhibitor. Sequences of peptides are given in Table 1.  $n \geq 3$ ; bars indicate 1 standard deviation.

**B.** Percent activity for each peptide assayed in A. Values were calculated relative to the no-inhibitor control and converted to average percent inhibition.

**Figure S5A. Ribbon model of Prp dimer.** Catalytic residues and the modeled flexible loop between them are depicted. The His and Cys are arranged in a pro-catalytic conformation and ionized. His 22 is always on a flexible loop due to preceding Gly 21.

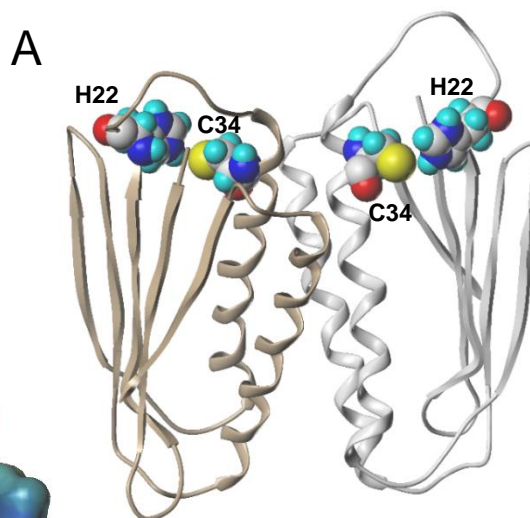

**Figure S5B. Surface hydrophobicity map of Prp dimer.** Conserved residues around the active site are labeled. Hydrophobic regions are depicted in brown and hydrophilic regions in blue, with green representing a median value. A large hydrophobic patch appears below the catalytic center, presenting a likely binding region for hydrophobic residues in the substrate. The hydrophobic patch on the bottom of the other chain could be where residues at the N-terminus of the cleavage motif bind.

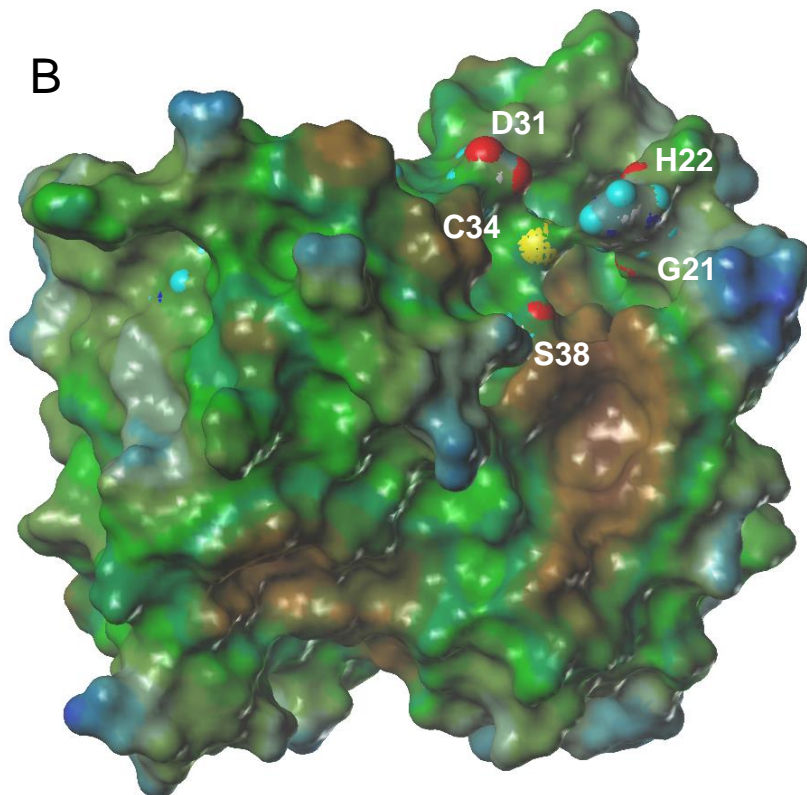

**Figure S5C. Surface hydrophobicity map of Prp dimer with docked peptide.** Conserved residues around the active site are labeled. Docked peptide Ac-NLQFFAS-Am is depicted in white surface and atomic color convention. Here the sidechain of extremely conserved P3 Gln in the substrate protrudes into solvent, apparently making no contact with the enzyme. This paired with the lack of substrate binding by the extremely conserved Asp 31 sidechain makes it seem even more likely that the flexible loop somehow folds over the substrate during catalysis, perhaps associating these two residues.

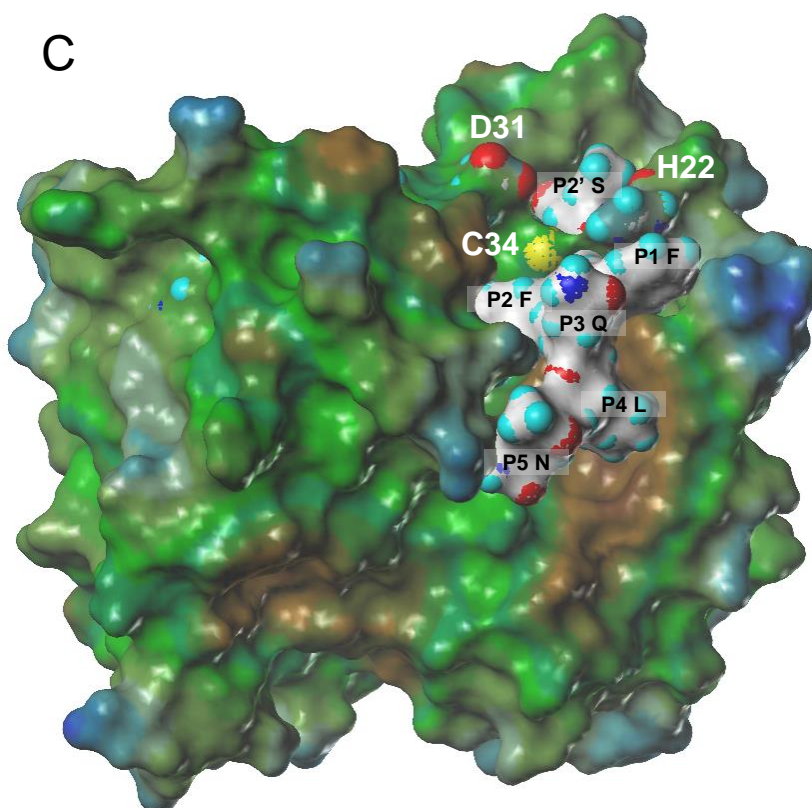

Supplement: NIHMS854606-supplement-Supp_data.pdf [file NIHMS854606-supplement-Supp_data.pdf]
